# Supplementary material for: Postingestive reinforcement is conserved in obesity and after bariatric surgery
Source: bioRxiv or medRxiv preprint supplement (doi:10.1101/2023.07.17.23292625), 2023-07-18
Supplement: Supplementary file [file media-1.pdf]

## **Supplemental data**

### **Postingestive reinforcement is conserved in obesity and after bariatric surgery**

Gabriela Ribeiro, Ana B. Fernandes, Francisco P.M. Oliveira, João S. Duarte, Maria Oliveira, Clotilde Limbert, Durval C. Costa, Rui M. Costa, Albino J. Oliveira-Maia.

## **Supplemental figures**

**Supplementary Figure 1** - Complementary conditioning measures in healthy subjects.

**Supplementary Figure 2** - Flow diagrams of the clinical study groups.

**Supplementary Figure 3** - Complementary conditioning measures across the clinical study groups.

## **Supplemental Tables**

**Supplementary Table 1** - Demographic characteristics of healthy subjects.

**Supplementary Table 2** - Gustatory and psychometric measures of feeding behaviour in healthy subjects.

**Supplementary Table 3** - Associations between striatal dopamine DD2IR availability, the conditioning strength, and feeding behaviour.

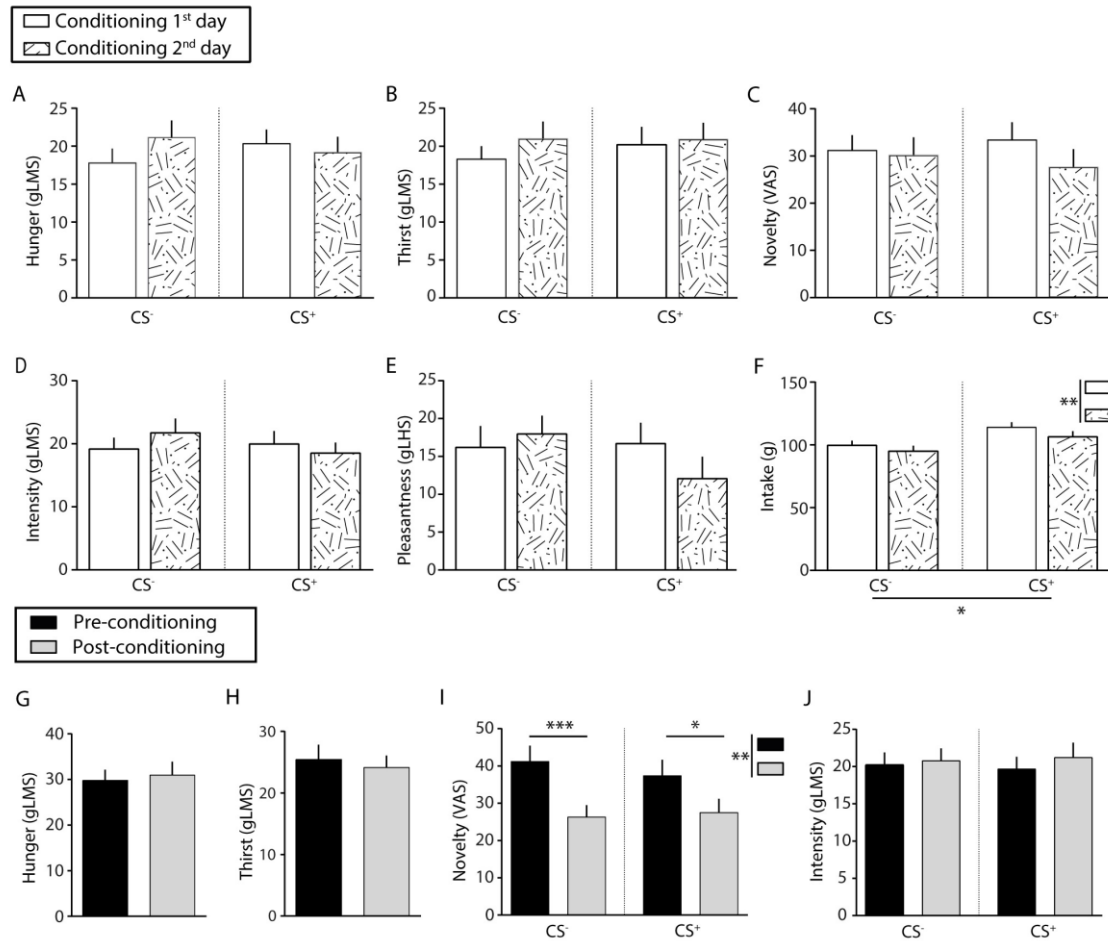

### Supplementary Figure 1. Complementary conditioning measures in healthy subjects.

Across conditioning for CS<sup>-</sup> and CS<sup>+</sup> flavors, ratings did not vary according to stimulus or conditioning day for (A) **Hunger** (Stimulus:  $F_{(1,102)}=0.04$ ,  $P=0.8$ ; Day:  $F_{(1,102)}=3.0$ ,  $P=0.08$ ; Interaction:  $F_{(1,102)}=9.9$ ,  $P=0.9$ ) (B) **Thirst** (Stimulus:  $F_{(1,102)}=0.1$ ,  $p=0.8$ ; Day:  $F_{(1,102)}=3.2$ ,  $P=0.07$ ; Interaction:  $F_{(1,102)}=0.08$ ,  $P=0.8$ ) (C) **Novelty** (Stimulus:  $F_{(1,102)}=0.002$ ,  $P=0.9$ ; Day:  $F_{(1,102)}=2.7$ ,  $P=0.1$ ; Interaction:  $F_{(1,102)}=1.3$ ,  $P=0.3$ ) (D) **Intensity** (Stimulus:  $F_{(1,99)}=0.3$ ,  $P=0.6$ ; Day:  $F_{(1,99)}=0.09$ ,  $P=0.8$ ; Interaction:  $F_{(1,99)}=1.2$ ,  $P=0.3$ ) and (E) **Pleasantness** (Stimulus:  $F_{(1,98)}=0.9$ ,  $P=0.3$ ; Day:  $F_{(1,98)}=0.4$ ,  $P=0.5$ ; Interaction:  $F_{(1,98)}=1.9$ ,  $P=0.2$ ). (F) **Intake** volumes were higher for CS<sup>+</sup> than CS<sup>-</sup> ( $F_{(1,102)}=5.5$ ,  $P=0.02$ ), and decreased across conditioning days ( $F_{(1,102)}=8.1$ ,  $P=0.005$ ; Interaction:  $F_{(1,102)}=0.5$ ,  $P=0.5$ ; repeated-measures 2-way ANOVA).

(G) **Hunger** ratings remained stable from pre-to post conditioning ( $t_{(50)}=0.3$ ,  $P=0.8$ ) as well as (H) **Thirst** ratings ( $t_{(50)}=0.5$ ,  $P=0.6$ ; paired t-test). (I) **Novelty** ratings significantly decreased from pre to post-conditioning ( $F_{(1,51)}=10.2$ ,  $P=0.002$ ; post-hoc CS<sup>-</sup>,  $P=0.0001$ ; post-hoc CS<sup>+</sup>,  $P=0.01$ ) but similarly for both stimuli ( $F_{(1,51)}=0.17$ ,  $P=0.7$ ; Interaction:  $F_{(1,51)}=1.1$ ,  $P=0.3$ ). (J) **Intensity** ratings remained similar from pre to post-conditioning ( $F_{(1,51)}=0.6$ ,  $P=0.6$ ), for both CS<sup>-</sup> and CS<sup>+</sup> flavors ( $F_{(1,51)}=0.0003$ ,  $P=0.9$ ; Interaction:  $F_{(1,51)}=0.2$ ,  $P=0.7$ ; repeated-measures 2-way ANOVA).

Bar graphs represent mean  $\pm$  standard error of the mean (SEM).

gLMS/ gLHS - general labeled magnitude/hedonic scale.

VAS: Visual Analogue Scale.

\* $P \leq 0.05$ ; \*\* $P \leq 0.01$ ; \*\*\* $P \leq 0.001$

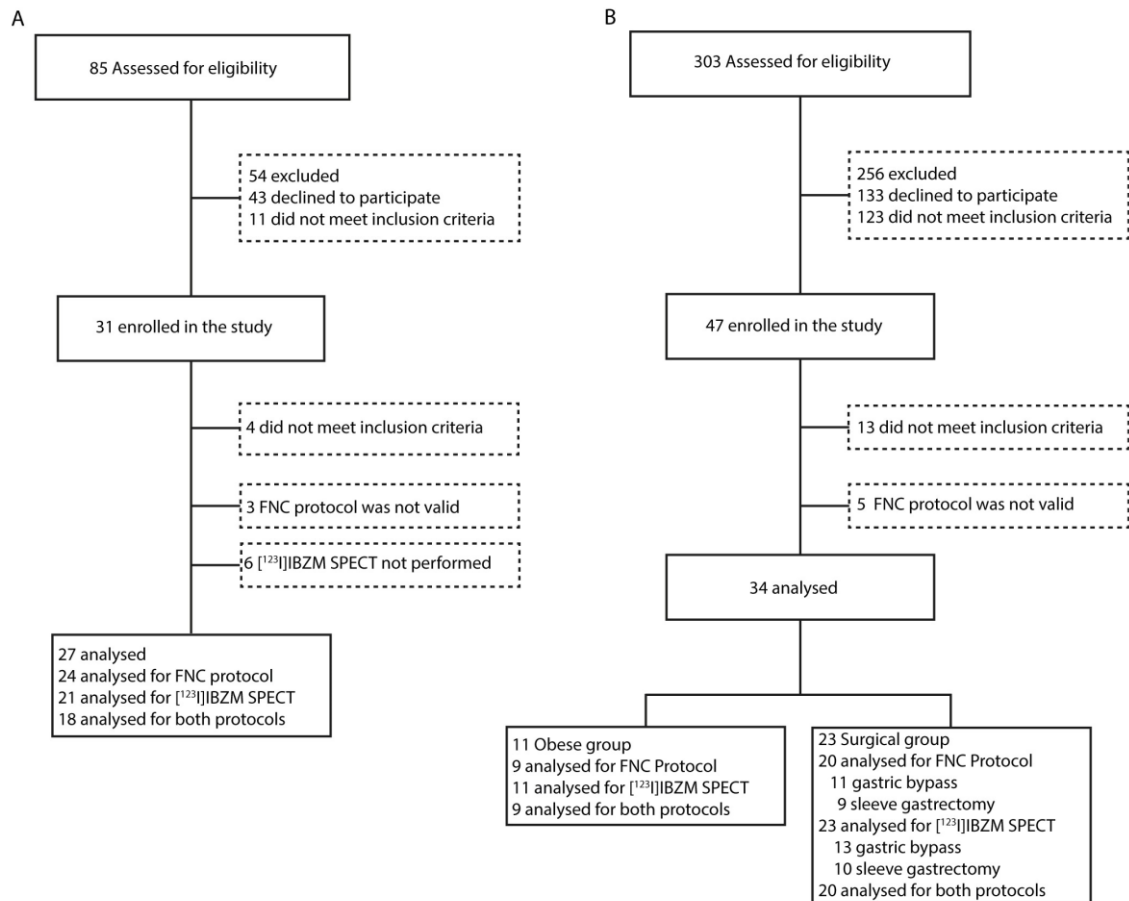

**Supplementary Figure 2. Flow diagrams of the clinical study groups.**

(A) Flow diagram of recruitment of the healthy control group. Six volunteers did not perform SPECT due to failures in  $[^{123}\text{I}]$ IBZM delivery or malfunction of the gamma camera. In 3 participants there was an error in FNC protocol.

(B) Flow diagram of the recruitment of the obesity and surgical groups. Across both groups, 5 participants were excluded from analysis of FNC according to exclusion criteria mentioned in methods.

FNC: Flavour Nutrient Conditioning protocol;  $[^{123}\text{I}]$ IBZM SPECT:  $[^{123}\text{I}]$  iodobenzamide ( $[^{123}\text{I}]$ IBZM) single photon emission computed tomography (SPECT).

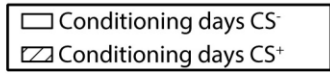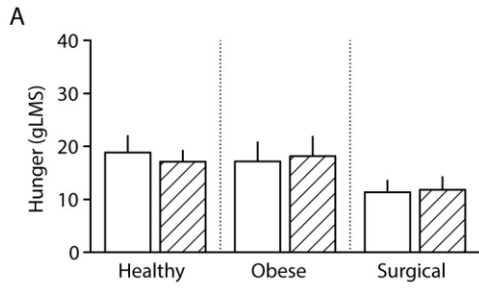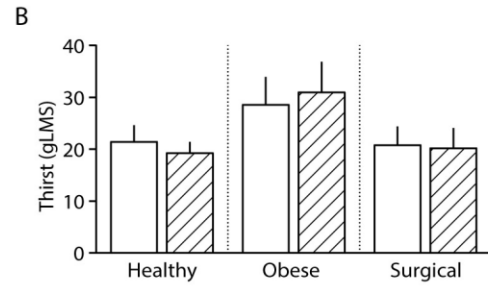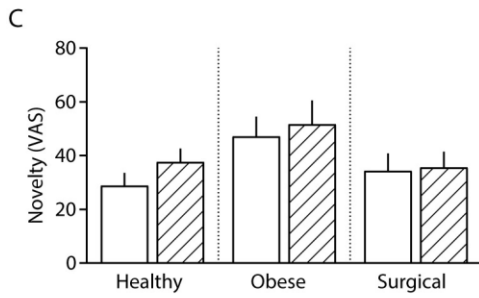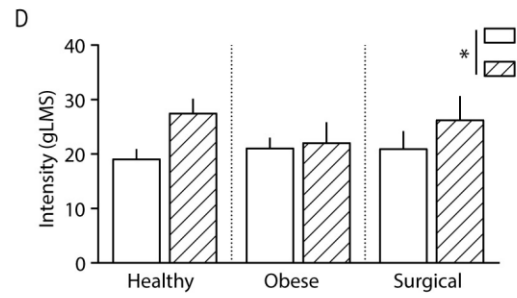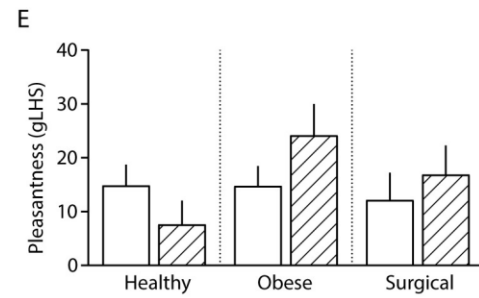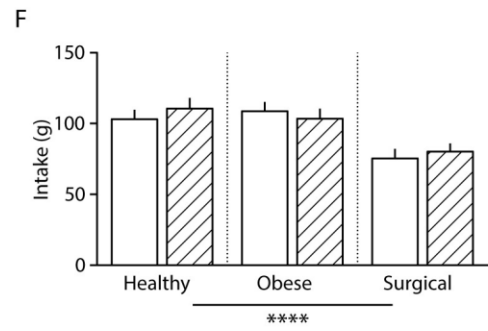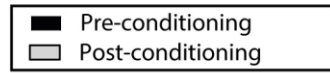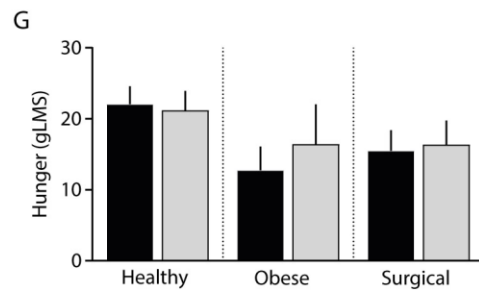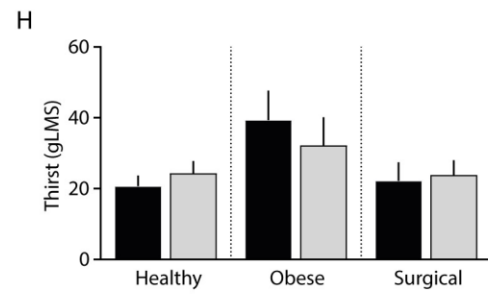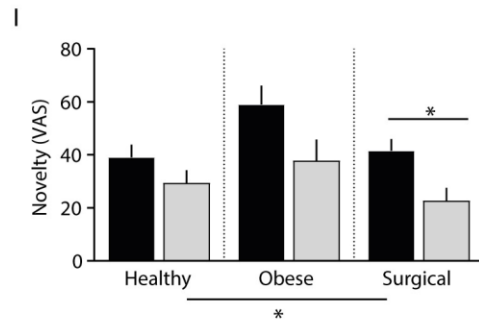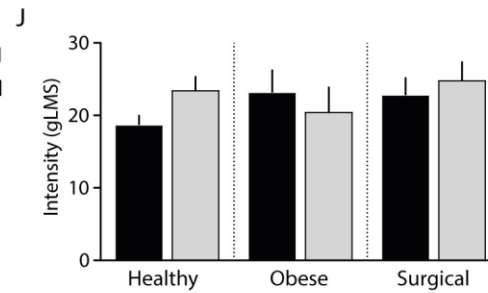

### Supplementary Figure 3. Complementary conditioning measures across the clinical study groups.

Across conditioning for CS<sup>-</sup> and CS<sup>+</sup> flavours, ratings did not vary according to stimulus or group for **(A) Hunger** (Stimulus:  $F_{(1, 50)}=0.003$ ,  $P=0.96$ ; Group:  $F_{(2, 50)}=2.2$ ,  $P=0.1$ ; Interaction:  $F_{(2, 50)}=0.1$ ,  $P=0.7$ ); **(B) Thirst** (Stimulus:  $F_{(1, 50)}=0.01$ ,  $P=0.9$ ; Group:  $F_{(2, 50)}=1.5$ ,  $P=0.22$ ; Interaction:  $F_{(2, 50)}=0.96$ ,  $P=0.4$ ) and **(C) Novelty** (Stimulus:  $F_{(1, 50)}=1.6$ ,  $P=0.2$ ; Group:  $F_{(2, 50)}=1.8$ ,  $P=0.17$ ; Interaction:  $F_{(2, 50)}=0.5$ ,  $P=0.6$ ). **(D) Intensity** ratings were different in CS<sup>-</sup> vs. CS<sup>+</sup> ( $F_{(1, 50)}=5.2$ ,  $P=0.03$ ), with a non-significant effects for Group ( $F_{(2, 50)}=0.1$ ,  $P=0.9$ ) nor for interaction ( $F_{(2, 50)}=0.9$ ,  $P=0.4$ ). **(E) Pleasantness** ratings, however, did not differ according to stimulus ( $F_{(1, 50)}=0.5$ ,  $P=0.5$ ) nor according to group ( $F_{(1, 50)}=0.7$ ,  $P=0.5$ ; Interaction:  $F_{(2, 50)}=2.5$ ,  $P=0.1$ ). **(F) Intake** was similar across conditioning for CS<sup>-</sup> and CS<sup>+</sup> flavours ( $F_{(1, 50)}=0.5$ ,  $P=0.5$ ) and despite findings of a significant group effect ( $F_{(1, 50)}=7.5$ ,  $P=0.001$ ), interaction between factors was not significant ( $F_{(2, 50)}=1.0$ ,  $P=0.4$ ; mixed-model 2-way ANOVA).

From pre- to post-conditioning days, ratings remained stable, and did not vary according to group for **(G) Hunger** (Time:  $F_{(1, 47)}=0.2$ ,  $P=0.6$ ; Group:  $F_{(2, 50)}=1.98$ ,  $P=0.2$ ; Interaction:  $F_{(2, 47)}=0.3$ ,  $P=0.7$ ); and **(H) Thirst** (Time:  $F_{(1, 47)}=0.05$ ,  $P=0.8$ ; Group:  $F_{(2, 50)}=2.5$ ,  $P=0.1$ ; Interaction:  $F_{(2, 47)}=0.8$ ;  $P=0.5$ ). **(I) Novelty** ratings changed from pre to post-conditioning ( $F_{(1, 50)}=12.9$ ,  $P=0.001$ ), with a significant effect for group ( $F_{(2, 50)}=3.4$ ,  $P=0.04$ ) and a non-significant interaction between factors ( $F_{(2, 50)}=0.7$ ;  $P=0.5$ ). Post-hoc tests showed significant decreases for the surgical group ( $P=0.05$ ), while in the remaining groups results did not reach significance (Healthy,  $P=0.4$ ; Obese,  $P=0.1$ ). **(J) Intensity** ratings remained similar from pre to post-conditioning ( $F_{(1, 50)}=0.7$ ,  $P=0.4$ ), with no effects for group ( $F_{(2, 50)}=0.66$ ,  $P=0.52$ ) nor interaction ( $F_{(2, 50)}=1.5$ ;  $P=0.2$ ; mixed-model 2-way ANOVA).

Bar graphs represent mean  $\pm$  standard error of the mean (SEM).

gLMS/ gLHS - general labeled magnitude/hedonic scale.

VAS: Visual Analogue Scale.

\* $P \leq 0.05$ ; \*\* $P \leq 0.01$ ; \*\*\* $P \leq 0.001$

**Supplementary Table 1. Demographic characteristics of healthy subjects.**

| Variable               | Healthy 'FNC development' protocol |                                                                   |                                                                    | P-value <sup>C</sup> |
|------------------------|------------------------------------|-------------------------------------------------------------------|--------------------------------------------------------------------|----------------------|
|                        | All (n=52)                         | Baseline low intake %pref.<br>CS <sup>+</sup> (n=28) <sup>A</sup> | Baseline high intake %pref.<br>CS <sup>+</sup> (n=24) <sup>A</sup> |                      |
|                        | Mean (SD), Min-Max or No. (%)      |                                                                   |                                                                    |                      |
| Age, years             | 28.5 (7.1), 18 – 48                | 28.46 (7.25), 18 – 47                                             | 28.58 (7.17), 20 – 48                                              | 0.95                 |
| Gender (male)          | 15 (28.8%)                         | 7 (25.0%)                                                         | 8 (33.3%)                                                          | 0.51                 |
| BMI, Kg/m <sup>2</sup> | 23.1 (3.2), 18.0 – 34.0            | 22.92 (2.57), 19.08 – 31.16                                       | 23.22 (3.88), 17.99 – 34.01                                        | 0.74                 |
| Education, years       | 14.2 (2.6), 9 – 19                 | 13.71 (2.66), 9 – 19                                              | 14.83 (2.46), 12 – 17                                              | 0.12                 |
| Smokers                | 12 (23.1%)                         | 7 (11.1%)                                                         | 5 (20.8%)                                                          | 0.72                 |

<sup>A</sup>Baseline low intake preference for CS<sup>+</sup> < 50% in the pre-test; <sup>B</sup>Baseline high intake preference for CS<sup>+</sup> ≥ 50% in the pre-test.

<sup>C</sup>Independent samples t-tests were performed for continuous variables and  $\chi^2$  tests for categorical variables for comparisons between baseline low and high intake preference for CS<sup>+</sup>

**Supplementary Table 2. Gustatory and psychometric measures of feeding behaviour in healthy subjects.**

| Variable                   | Healthy ('FNC development' protocol) |                                                                   |                                                                    | P value <sup>C</sup> |
|----------------------------|--------------------------------------|-------------------------------------------------------------------|--------------------------------------------------------------------|----------------------|
|                            | All (n=52)                           | Baseline low intake %pref. CS <sup>+</sup><br>(n=28) <sup>A</sup> | Baseline high intake %pref. CS <sup>+</sup><br>(n=24) <sup>B</sup> |                      |
|                            | Mean (SD), Min-Max or No. (%)        |                                                                   |                                                                    |                      |
| Taste Tresholds, <i>dB</i> | 4.27 (8.75), -6 – 34.0               | 2.84 (7.78), -6 – 24                                              | 5.78 (9.65), -6 – 34                                               | 0.31                 |
| Accuity                    | 13.14 (2.49), 7.00 – 16.0            | 12.8 (2.5), 7 – 16                                                | 13.5 (2.48), 7 -16                                                 | 0.38                 |
| Sour ratings, <i>mm</i>    |                                      |                                                                   |                                                                    |                      |
| Intensity                  | 57.11 (19.76), 20.00 – 98.0          | 56.26 (18.7), 20 – 97.5                                           | 58.13 (21.41), 27 – 98.0                                           | 0.76                 |
| Pleasantness               | -33.71 (32.55), -94.75 – 41.5        | -34.61 (31.62), -81 – 41.5                                        | -32.63 (34.43), -94.75 – 29.25                                     | 0.84                 |
| Salt ratings, <i>mm</i>    |                                      |                                                                   |                                                                    |                      |
| Intensity                  | 28.38 (14.56), 5.75 – 72.75          | 26.24 (11.71), 11 – 51.25                                         | 30.95 (17.34), 5.75 – 72.75                                        | 0.29                 |
| Pleasantness               | -4.59 (18.70), -76.0 – 25.75         | -2.47 (16.13), -43 – 25.75                                        | -7.13 (21.54), -76 – 15.75                                         | 0.42                 |
| Sweet ratings, <i>mm</i>   |                                      |                                                                   |                                                                    |                      |
| Intensity                  | 17.05 (8.0), 6.25 – 38.50            | 16.07 (6.90), 6.25 – 30.50                                        | 18.23 (9.19), 6.75 – 38.50                                         | 0.38                 |
| Pleasantness               | 8.97 (9.73), -16.75 – 34.50          | 7.48 (9.73), -16.75 – 27.75                                       | 10.75 (9.67), -5.25 – 34.50                                        | 0.27                 |
| Bitter ratings, <i>mm</i>  |                                      |                                                                   |                                                                    |                      |
| Intensity                  | 40.22 (20.15) 6.25 – 79.50           | 42.58 (21.26), 6.25 – 78.75                                       | 37.38 (18.86), 16.25 – 79.50                                       | 0.4                  |

**Supplementary Table 2. (Continued)**

| Variable               | Healthy ('FNC development' protocol) |                                                                  |                                                                   | P value <sup>C</sup> |
|------------------------|--------------------------------------|------------------------------------------------------------------|-------------------------------------------------------------------|----------------------|
|                        | All (n=52)                           | Baseline low intake pref. CS <sup>+</sup><br>(n=28) <sup>A</sup> | Baseline high intake pref. CS <sup>+</sup><br>(n=24) <sup>B</sup> |                      |
|                        | Mean (SD), Min-Max or No. (%)        |                                                                  |                                                                   |                      |
| Pleasantness           | -36.23 (24.02), -74.25 – -1.50       | -39.46 (25.71), -74.25 – -1.50                                   | -32.35 (21.82), -72.25 – -6.0                                     | 0.33                 |
| PFS – Aggregate score  | 2.28 (0.66), 1.13 – 3.80             | 2.23 (0.65), 1.13 – 3.67                                         | 2.35 (0.68), 1.47 – 3.80                                          | 0.51                 |
| YFAS – Diagnosis       | 0 (%)                                | 0 (%)                                                            | 0 (%)                                                             | -                    |
| YFAS – No. of symptoms | 1.54 (1.09), 0 – 5                   | 1.46 (1.04), 0 – 4                                               | 1.64 (1.18), 0 – 5                                                | 0.59                 |
| DEBQ – External Eat    | 2.77 (0.53), 1.5 – 4.30              | 2.66 (0.49), 1.5 – 3.60                                          | 2.92 (0.56), 2.20 – 4.30                                          | 0.08                 |
| DEBQ – Restrained Eat  | 2.35 (0.74), 1.00 – 4.50             | 2.28 (0.64), 1.3 – 4                                             | 2.42 (0.87), 1.0 – 4.50                                           | 0.51                 |
| DEBQ – Emotional Eat   | 1.99 (0.76), 0.77 – 4.38             | 1.81 (0.64), 0.77 – 3.15                                         | 2.21 (0.84), 1.0 – 4.38                                           | 0.06                 |
| FARS – Aggregate       | 401.87 (43.08), 303.0 – 506.0        | 399.46 (48.37), 303.0 – 506.0                                    | 404.39 (37.72), 332.0 – 471.0                                     | 0.70                 |

<sup>A</sup>Baseline low intake preference for CS<sup>+</sup> <50% in the pre-conditioning; <sup>B</sup>Baseline high intake preference for CS<sup>+</sup> ≥ 50% in the pre-conditioning.

<sup>C</sup>Independent samples t-tests were performed for continuous variables and  $\chi^2$  tests for categorical variables for comparisons between baseline low and high intake preference for CS<sup>+</sup>.

DEBQ - Dutch Eating Behaviour Questionnaire; FARS - Food Action Rating Scale; PFS - Power of Food Scale; YFAS - Yale Food Addiction Scale.



**Supplementary Table 3. Associations between striatal dopamine DD2IR availability, the conditioning strength, and feeding behaviour.**

| Striatal DD2IR availability    | Healthy (n=18) |         | Obese (n=9) |         | Surgical   |         |               |         |              |         |
|--------------------------------|----------------|---------|-------------|---------|------------|---------|---------------|---------|--------------|---------|
|                                |                |         |             |         | All (n=20) |         | Bypass (n=11) |         | Sleeve (n=9) |         |
|                                | r              | P-value | r           | P-value | r          | P-value | r             | P-value | r            | P-value |
| BMI, kg/m <sup>2</sup>         | 0.23           | 0.36    | -0.78       | 0.01    | -0.30      | 0.19    | -0.05         | 0.89    | -0.49        | 0.18    |
| Δ intake pref. CS <sup>+</sup> | 0.04           | 0.87    | 0.05        | 0.89    | -0.14      | 0.57    | -0.68         | 0.02    | 0.49         | 0.18    |
| Taste Tresholds                | -0.29          | 0.24    | -0.25       | 0.52    | -0.05      | 0.86    | 0.07          | 0.85    | -0.18        | 0.70    |
| Acuity                         | -0.20          | 0.42    | -0.40       | 0.28    | -0.14      | 0.55    | 0.28          | 0.41    | -0.50        | 0.17    |
| Sour ratings (mm)              |                |         |             |         |            |         |               |         |              |         |
| Intensity                      | -0.20          | 0.42    | -0.40       | 0.28    | -0.14      | 0.55    | 0.28          | 0.41    | -0.50        | 0.17    |
| Pleasantness                   | 0.18           | 0.48    | 0.26        | 0.49    | 0.11       | 0.66    | 0.21          | 0.53    | 0.02         | 0.96    |
| Salt ratings (mm)              |                |         |             |         |            |         |               |         |              |         |
| Intensity                      | 0.05           | 0.83    | -0.61       | 0.08    | -0.38      | 0.10    | -0.29         | 0.39    | -0.44        | 0.24    |
| Pleasantness                   | -0.08          | 0.76    | 0.65        | 0.06    | 0.05       | 0.85    | 0.38          | 0.24    | -0.32        | 0.41    |
| Sweet ratings (mm)             |                |         |             |         |            |         |               |         |              |         |
| Intensity                      | 0.06           | 0.82    | -0.44       | 0.23    | -0.36      | 0.11    | -0.46         | 0.15    | -0.27        | 0.49    |

**Supplementary Table 3. (Continued)**

| Striatal DD2IR availability | Healthy (n=18) |         | Obese (n=9) |         | Surgical   |         |               |         |              |         |
|-----------------------------|----------------|---------|-------------|---------|------------|---------|---------------|---------|--------------|---------|
|                             |                |         |             |         | All (n=20) |         | Bypass (n=11) |         | Sleeve (n=9) |         |
|                             | r              | P-value | r           | P-value | r          | P-value | r             | P-value | r            | P-value |
| Pleasantness                | -0.06          | 0.80    | -0.03       | 0.94    | 0.19       | 0.42    | -0.04         | 0.91    | 0.55         | 0.12    |
| Bitter ratings (mm)         |                |         |             |         |            |         |               |         |              |         |
| Intensity                   | -0.06          | 0.80    | -0.28       | 0.47    | -0.34      | 0.14    | -0.55         | 0.08    | -0.06        | 0.88    |
| Pleasantness                | 0.11           | 0.67    | 0.19        | 0.63    | 0.30       | 0.21    | 0.46          | 0.16    | 0.09         | 0.81    |
| PFS – Aggregate score       | -0.02          | 0.93    | -0.63       | 0.07    | 0.13       | 0.60    | 0.17          | 0.61    | 0.13         | 0.76    |
| PFS – Food Available        | 0.03           | 0.90    | -0.58       | 0.10    | 0.15       | 0.55    | 0.41          | 0.20    | -0.14        | 0.74    |
| PFS – Food Present          | 0.14           | 0.57    | -0.55       | 0.12    | -0.10      | 0.69    | -0.33         | 0.32    | 0.15         | 0.73    |
| PFS – Food tasted           | -0.25          | 0.32    | -0.61       | 0.08    | 0.22       | 0.36    | 0.12          | 0.74    | 0.39         | 0.34    |
| YFAS – No. of symptoms      | -0.22          | 0.39    | -0.61       | 0.08    | -0.17      | 0.49    | -0.11         | 0.76    | -0.16        | 0.68    |
| DEBQ – External Eat         | -0.12          | 0.64    | -0.46       | 0.21    | 0.16       | 0.51    | 0.36          | 0.28    | -0.21        | 0.61    |
| DEBQ – Restrained Eat       | 0.16           | 0.52    | 0.28        | 0.47    | 0.19       | 0.44    | 0.77          | 0.01    | -0.26        | 0.54    |
| DEBQ – Emotional Eat        | 0.16           | 0.53    | -0.66       | 0.05    | -0.22      | 0.39    | 0.16          | 0.65    | -0.57        | 0.18    |
| FARS – Aggregate            | -0.29          | 0.25    | -0.12       | 0.77    | 0.03       | 0.91    | 0.26          | 0.47    | -0.23        | 0.58    |

BMI - Body Mass Index; DEBQ - Dutch Eating Behaviour Questionnaire; PFS - Power of Food Scale; FARS - Food Action Rating Scale; Striatal DD2IR availability – Striatal dopamine D2-like receptor availability; YFAS - Yale Food Addiction Scale.  $\Delta$  intake pref. CS<sup>+</sup> (i.e., 'the conditioning strength'): the difference between intake preference for CS<sup>+</sup> (%) in the post minus the pre-test.
